# Supplementary material
Source: MDPI journal article supplement (https://www.mdpi.com/2311-7524/9/5/589)
Supplement: s1 [file s1]

## Supplementary Material

### Differential response of olive cultivars to leaf spot disease (*Fusicladium oleagineum*) under climate warming conditions in Morocco

Khaoula Habbadi, Ilyass Maafa, Abdellatif Benbouazza, Faïçal Aoujil, Hasnae Choukri, Salma El Iraqui El Houssaini, Ahmed El Bakkali

**Table S1:** List of cultivars used in the study, results of different parameters evaluated and their susceptibility to OLS disease

| # | Cultivar         | Origin  | Incidence (%) |       |      |      |      | Severity (%) |       |      |      |      | AUDPC   | Cultivar classification | Degree of susceptibility to OLS*  | Total chlorophyll (µg/mg) | Total polyphenols (mg·GAE/g) | Flavonoid Content (mg·CE/g) |
|---|------------------|---------|---------------|-------|------|------|------|--------------|-------|------|------|------|---------|-------------------------|-----------------------------------|---------------------------|------------------------------|-----------------------------|
|   |                  |         | March         | April | May  | June | July | March        | April | May  | June | July |         |                         |                                   |                           |                              |                             |
| 1 | Amellau          | France  | 10            | 8     | 8    | 5.5  | 2    | 7.5          | 2     | 2.5  | 2    | 0.75 | 1254,25 | Moderatly resistant     | 100% High                         | 0,40                      | 1,4                          | 1,01                        |
| 2 | Arbequine        | Spain   | 10.7          | 9     | 10.5 | 9.5  | 5    | 6            | 5.8   | 5    | 4.5  | 4    | 1225,25 | Moderatly Susceptible   | 50% High<br>5% Low<br>44% Medium  | 0,60                      | 4,8                          | 3,84                        |
| 3 | Ascolana tenera  | Italy   | 3             | 0     | 0    | 0    | 0    | 1.5          | 0     | 0    | 0    | 0    | 391,5   | Resistant               | 16% High<br>48% Low<br>34% Medium | 0,82                      | 7,91                         | 4,22                        |
| 4 | Blanqueta        | Spain   | 53            | 74    | 74.5 | 64.7 | 25   | 24.7         | 35.2  | 37   | 32.5 | 15   | 3045    | Susceptible             | 66% High<br>33% Low               | 0,75                      | 2,92                         | 1,53                        |
| 5 | Bouchouk Soummam | Algeria | 9             | 7     | 5.5  | 5    | 2.5  | 3            | 3.2   | 3    | 2.5  | 1.5  | 1065,75 | Moderatly resistant     |                                   | 0,89                      | 4,71                         | 2,58                        |
| 6 | Carmelitana      | Italy   | 3.5           | 1.5   | 2    | 2    | 1.5  | 2            | 0.3   | 0.75 | 0.75 | 0.5  | 1131    | Moderatly resistant     | 100% Medium                       | 0,58                      | 11,19                        | 7,91                        |
| 7 | Changlot Real    | Spain   | 3             | 0     | 0    | 0    | 0    | 2.5          | 0     | 0    | 0    | 0    | 1080,25 | Resistant               | 100% high                         | 0,43                      | 12,73                        | 8,95                        |
| 8 | Chetoui          | Tunisia | 4             | 1     | 1    | 1    | 0    | 2.7          | 0.12  | 0    | 0    | 0    | 1239,75 | Resistant               | 100% high                         | 0,50                      | 5,8                          | 3,75                        |
| 9 | Frantoio         | Italy   | 2.75          | 0     | 0    | 0    | 0    | 1            | 0     | 0    | 0    | 0    | 848,25  | Resistant               | 68% High<br>12% Low               | 0,50                      | 10,02                        | 7,88                        |

|    |                        |          |       |      |       |     |      |       |       |      |       |      |         |                       |            |      |       |      |
|----|------------------------|----------|-------|------|-------|-----|------|-------|-------|------|-------|------|---------|-----------------------|------------|------|-------|------|
|    |                        |          |       |      |       |     |      |       |       |      |       |      |         |                       | 19% Medium |      |       |      |
| 10 | Galega Vulgar          | Portugal | 3     | 1    | 3     | 2   | 2    | 1.5   | 0.44  | 0.5  | 0.5   | 0.15 | 848,25  | Moderately resistant  | 100% Low   | 0,60 | 6,93  | 4,09 |
| 11 | Grappolo               | Italy    | 2     | 2    | 2     | 1.5 | 0    | 1     | 0.25  | 0.25 | 0     | 0.12 | 819,25  | Moderately resistant  | 100% Low   | 0,99 | 15,03 | 10,1 |
| 12 | Leucocarpa             | Italy    | 3     | 0.5  | 1.5   | 0   | 0    | 1.75  | 0     | 0    | 0     | 0    | 652,5   | Resistant             | 100% Low   | 0,70 | 9,14  | 4,26 |
| 13 | Madonna Dell'Impruneta | Italy    | 2     | 2.5  | 2     | 2   | 2    | 0.5   | 0.39  | 0.5  | 0.5   | 0.15 | 942,5   | Moderately resistant  | 90% Low    | 0,40 | 5,23  | 3,6  |
|    |                        |          |       |      |       |     |      |       |       |      |       |      |         |                       | 9% Medium  |      |       |      |
| 14 | Maurino                | Italy    | 3.75  | 3    | 3.5   | 2.5 | 2    | 1.5   | 2.1   | 1    | 1     | 0.5  | 1276    | Moderately resistant  | 3% High    | 0,46 | 9,51  | 6,46 |
|    |                        |          |       |      |       |     |      |       |       |      |       |      |         |                       | 56% Low    |      |       |      |
| 15 | Moslala                | Morocco  | 7     | 7.5  | 4.5   | 4   | 2    | 4.75  | 5     | 3.75 | 3     | 0.5  | 841     | Moderately resistant  | 40% Medium | 0,82 | 9,11  | 4,24 |
|    |                        |          |       |      |       |     |      |       |       |      |       |      |         |                       |            |      |       |      |
| 16 | Piangente              | Italy    | 32.3  | 33.5 | 32    | 26  | 17   | 15.5  | 19.5  | 15   | 12.75 | 9.5  | 1421    | Moderatly Susceptible | 9% High    | 0,44 | 9,74  | 7,65 |
|    |                        |          |       |      |       |     |      |       |       |      |       |      |         |                       | 54% Low    |      |       |      |
| 17 | Picholine marocaine    | Morocco  | 50.5  | 52   | 48.75 | 45  | 20.5 | 13.75 | 15.79 | 14   | 12.7  | 8.5  | 2225,75 | Moderatly Susceptible | 36% Medium | 0,82 | 5,01  | 3,12 |
|    |                        |          |       |      |       |     |      |       |       |      |       |      |         |                       | 91% High   |      |       |      |
| 18 | Sevillenca             | Spain    | 3     | 0    | 3     | 4   | 3    | 1.5   | 0     | 1    | 1     | 1    | 913,5   | Moderately resistant  | 75% High   | 0,41 | 13,13 | 8,73 |
|    |                        |          |       |      |       |     |      |       |       |      |       |      |         |                       | 25% Medium |      |       |      |
| 19 | Tabelout               | Algeria  | 16.25 | 19   | 17.5  | 17  | 12.5 | 5.5   | 9.3   | 9    | 8.7   | 3.5  | 1399,25 | Moderatly Susceptible |            | 0,54 | 9,19  | 5,42 |
| 20 | Verdial Tansmontana    | Portugal | 27.7  | 26   | 23.5  | 21  | 7.5  | 4     | 3.5   | 2    | 2.5   | 1.75 | 899     | Moderatly Susceptible |            | 0,43 | 5,84  | 3,85 |

\* Classification based on the web-based edition OLEA database (<http://www.oleadb.it/>)

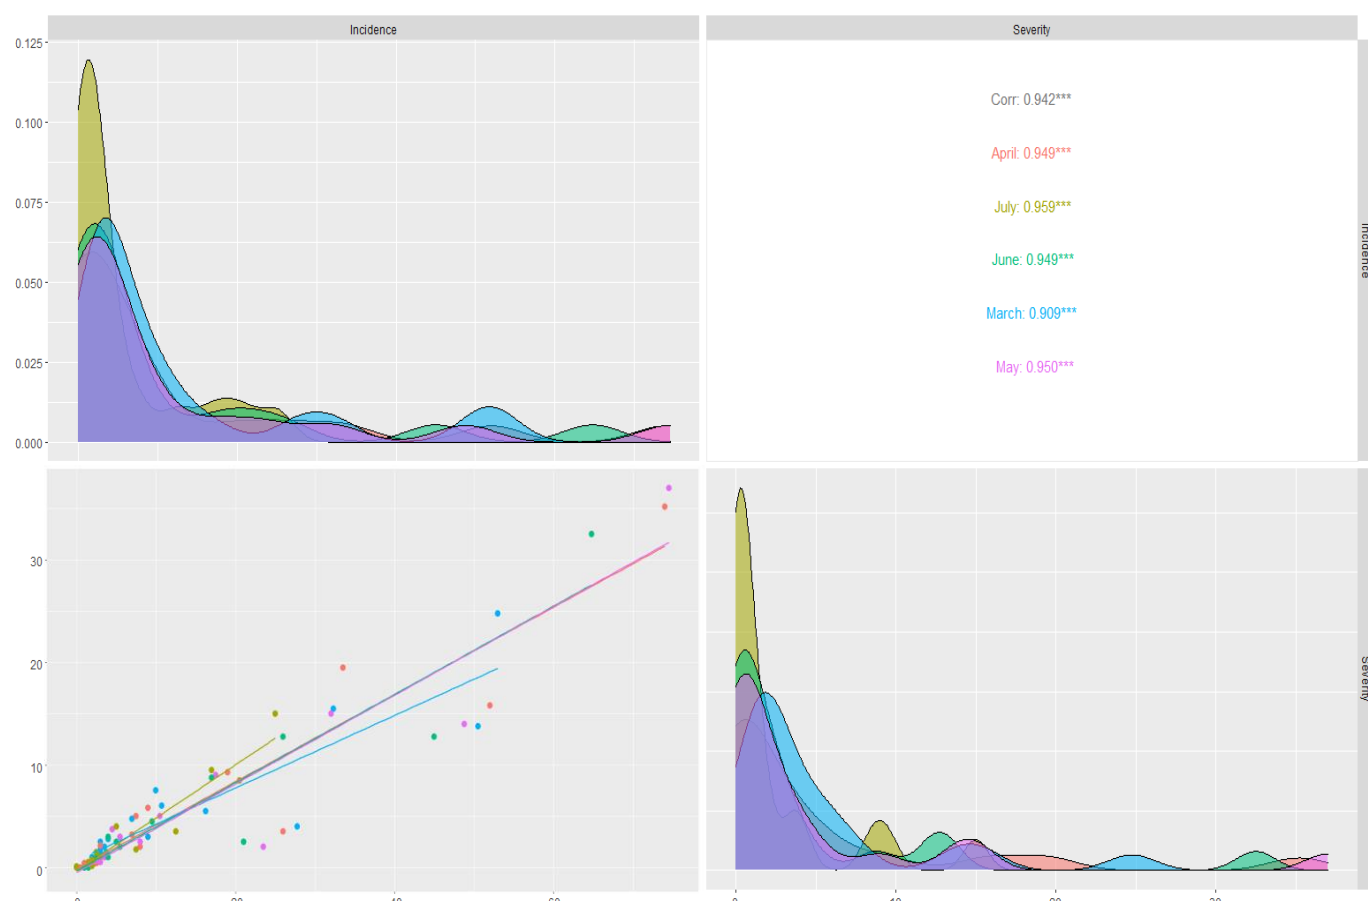

**Figure S1.** Pearson correlation between the incidence and severity disease indices in each sampling month.

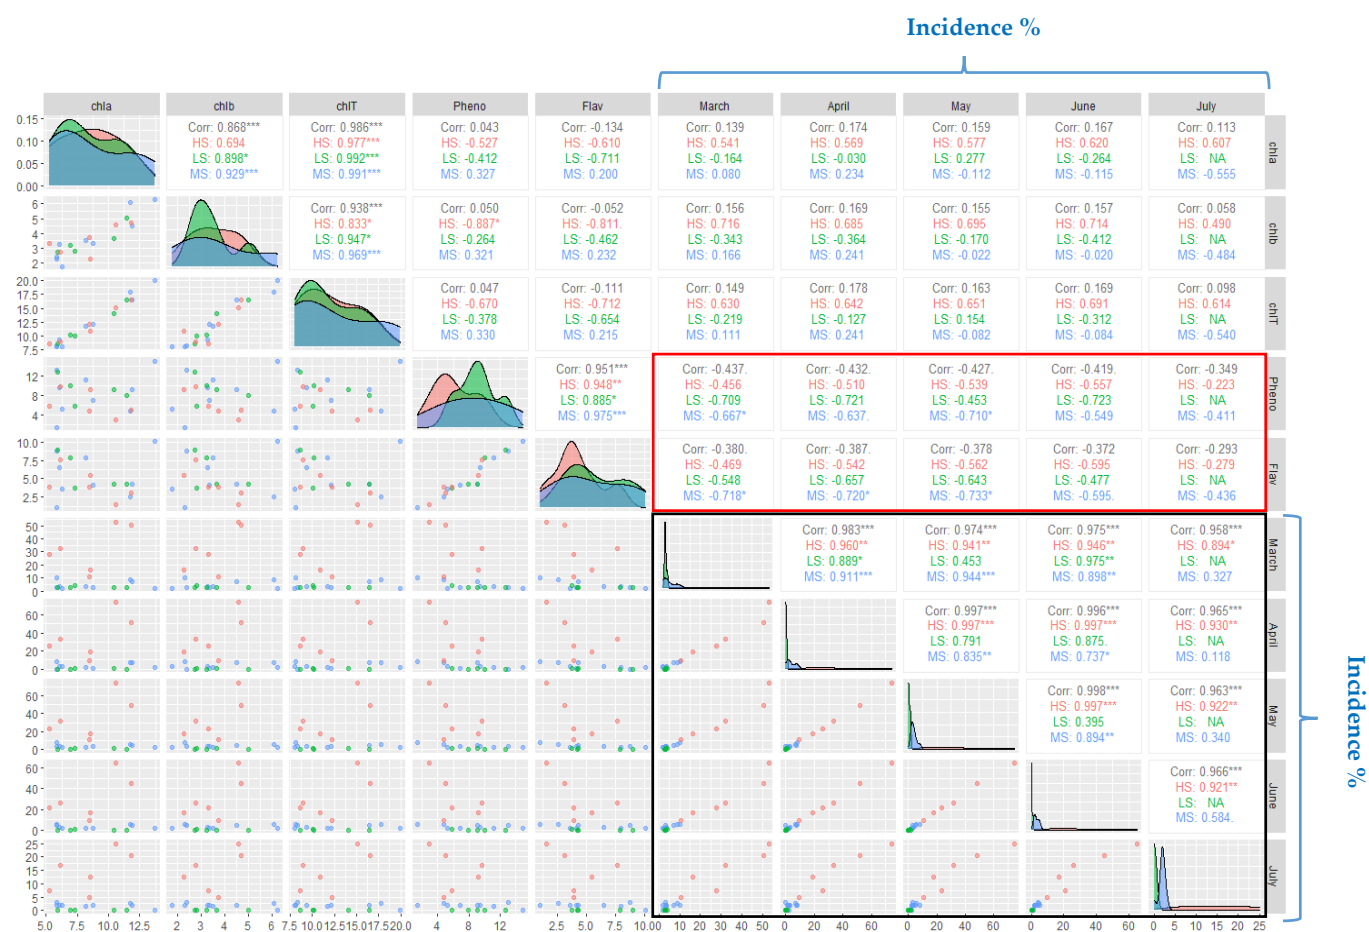

**Figure S2.** Pearson correlation between the OLS disease incidence and biochemical contents in each sampling month of the study.

HS: Highly susceptible; LS: least susceptible; MS: Moderately susceptible; ChT: chlorophyll total; Chla: chlorophyll a; chl b: chlorophyll b; Pheno: polyphenols; Flav: flavonoids.

- In these results, a positive linear relationships was observed between the incidence in each month of the study (the black frame).
- A negative linear relationship exists between the incidence and chlorophyll, polyphenols and flavonoids contents. The Incidence over months of the OLS disease was negatively correlated with polyphenols and flavonoids contents (Red Frame)
